# Supplementary material for: Wnt-beta-catenin pathway signals metastasis-associated tumor cell phenotypes in triple negative breast cancers
Source: PubMed Central journal article supplement (PMC5190013; doi:10.18632/oncotarget.8988), 2016-04-26
Supplement: oncotarget-07-43124-s001.pdf [file oncotarget-07-43124-s001.pdf]

## Wnt-beta-catenin pathway signals metastasis-associated tumor cell phenotypes in triple negative breast cancers

### SUPPLEMENTARY FIGURES AND MOVIES

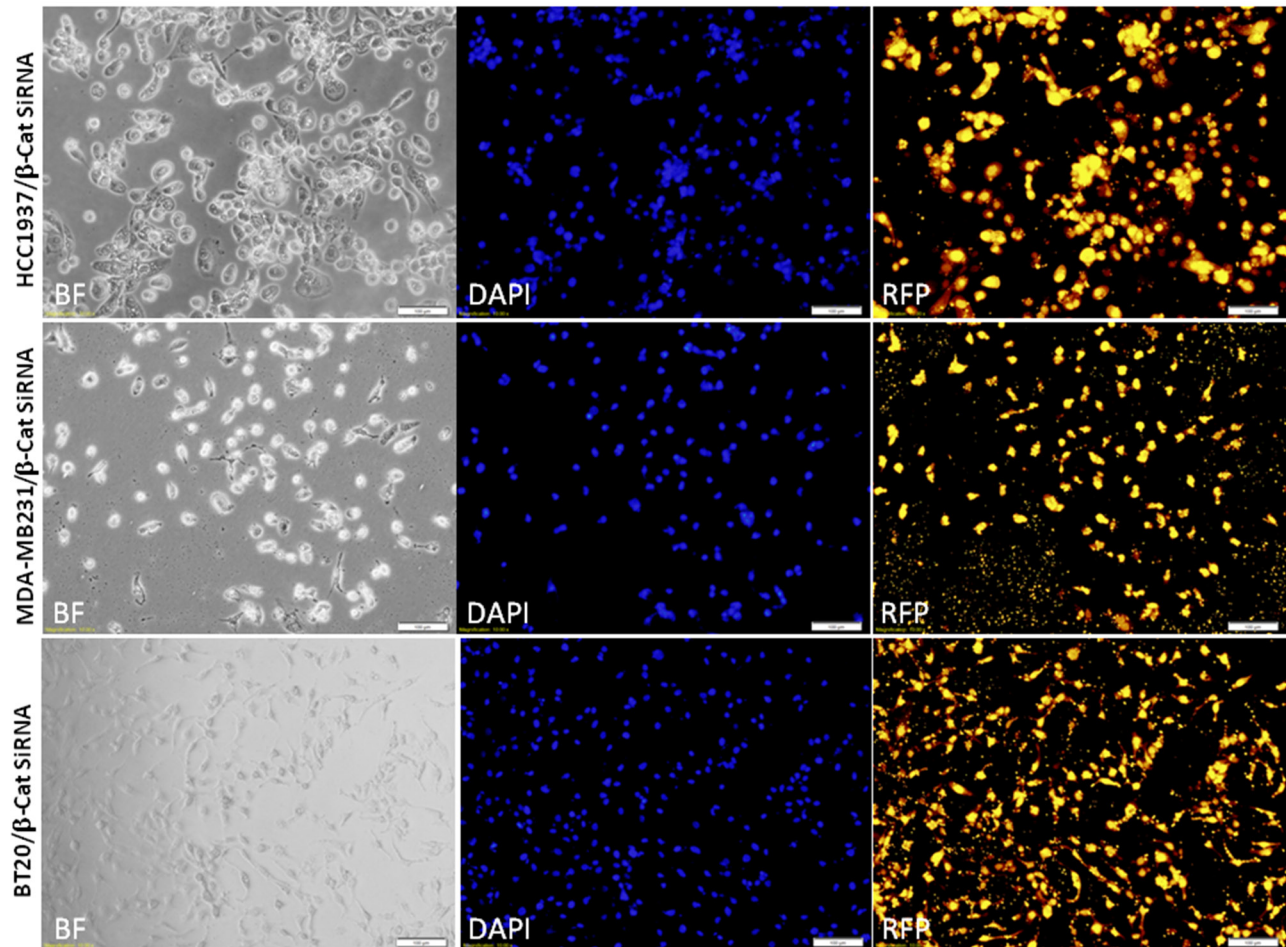

**Supplementary Figure S1:** Transient transfection efficiency of beta-catenin siRNA in TNBC cells was tested using RFP. Bright field and DAPI stained pictures are included for the same field as the reference.

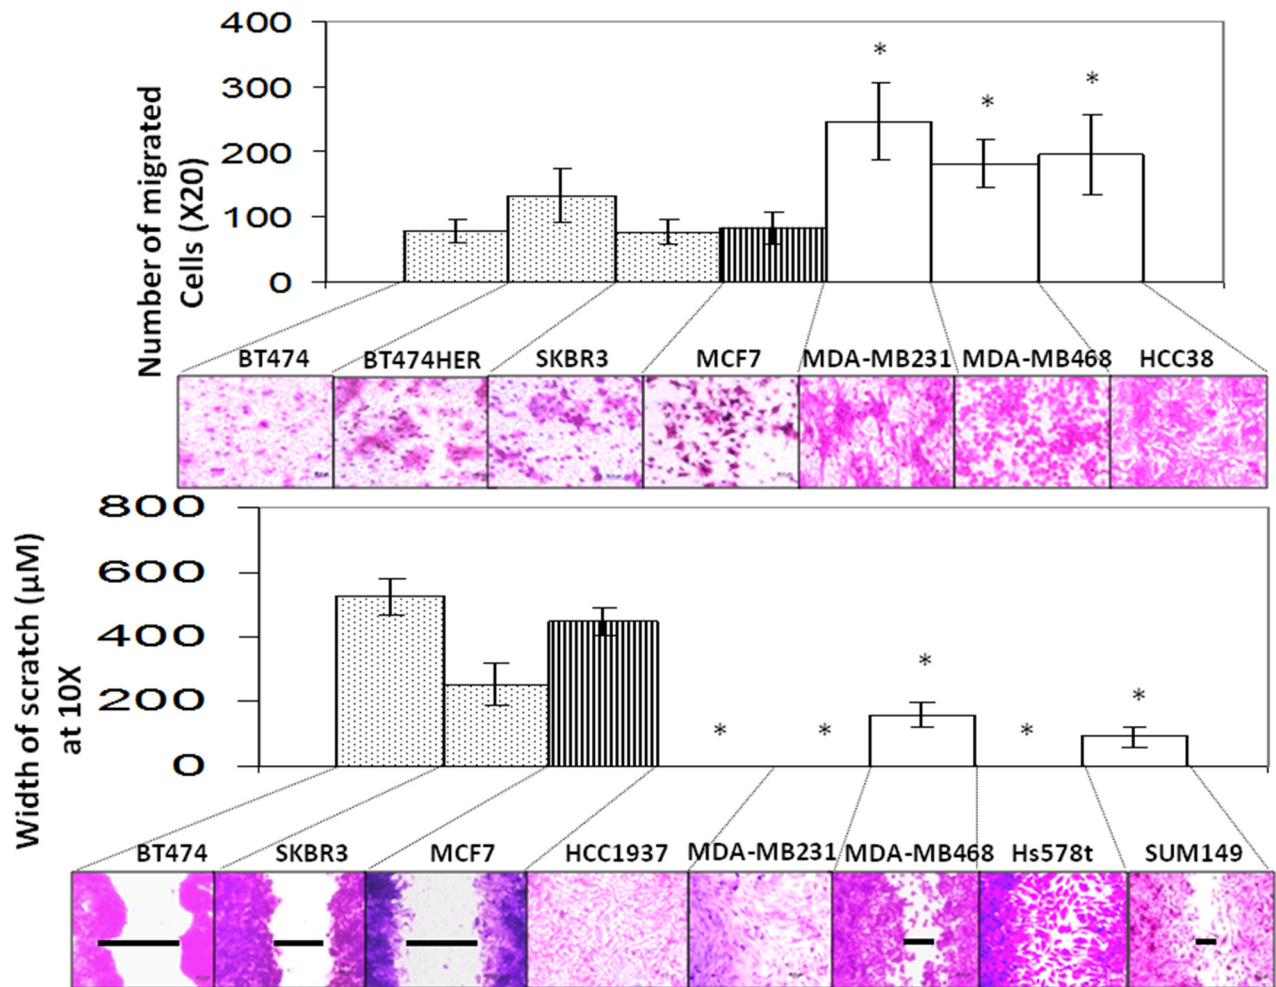

**Supplementary Figure S2: Fibronectin-directed migration in TNBC, HR and HER2+ BC cell lines using both transwell and scratch assays are presented.** Upper panel shows the fibronectin-mediated migration of HR+ MCF7 cells, HER2-overexpressed BT474, BTH474 and SKBr3 cells, and MDA-MB231, MDA-MB468, HCC38 TNBC cell lines by transwell assay for 24 hours. Each bar represents Mean ± SD of the number of cells migrated. n=8-10, \*p< 0.05. The lower panel shows the fibronectin-mediated migration of HR+ MCF7 cells, HER2-overexpressed BT474, BTH474 and SKBr3 cells, and MDA-MB231, MDA-MB468, HCC38 TNBC cell lines by scratch assay for 24 hours. Each bar represents Mean ± SD of the width of the scratch. The black line indicates distance measured in micron). n=8-10, \*p< 0.05.

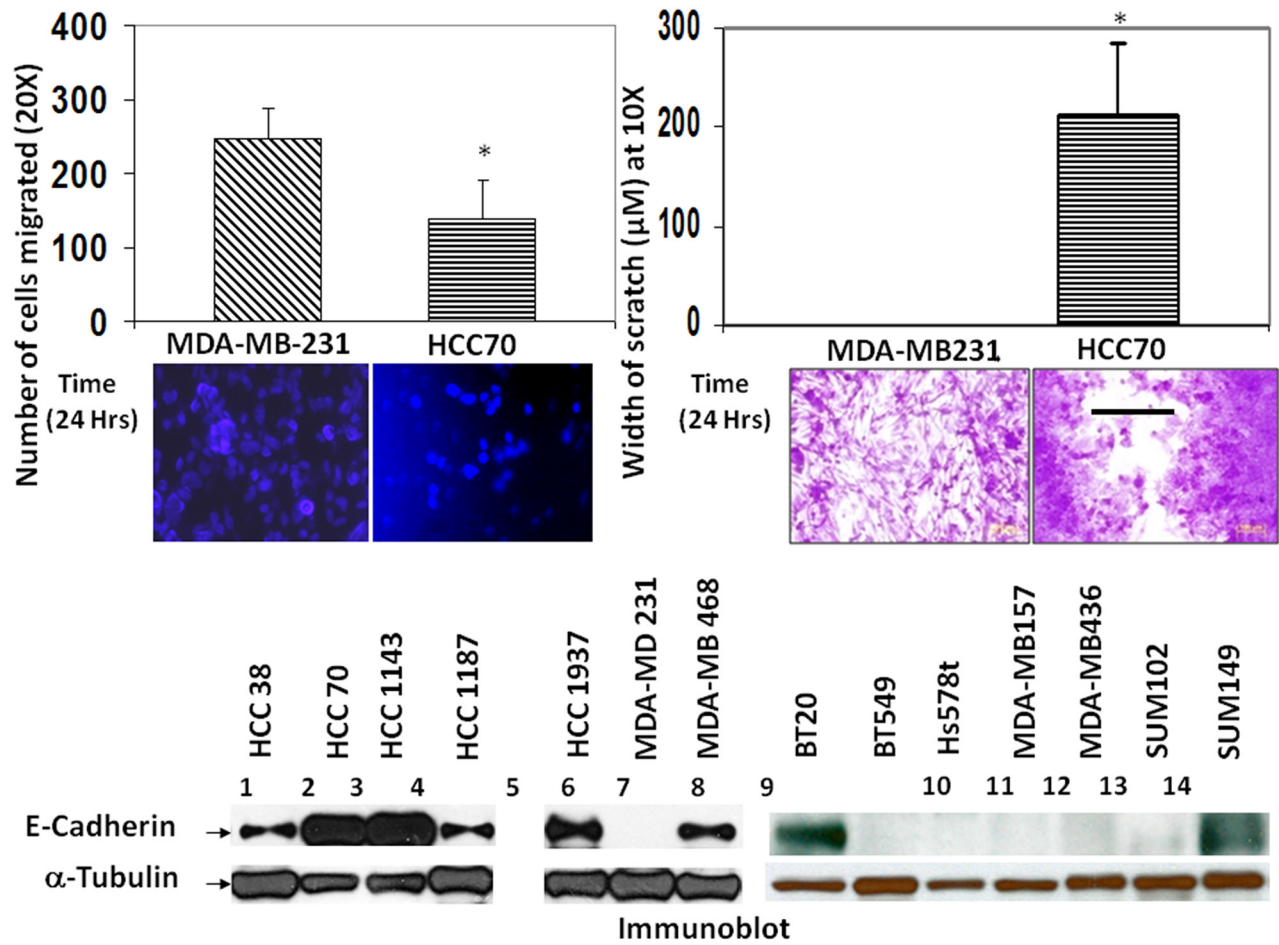

**Supplementary Figure S3: Correlation between the expression levels of E-cadherin and fibronectin directed migration in TNBC cell lines:** E-cadherin expression (lower panel) and fibronectin-directed migration (Transwell assay and Scratch Assay) in HCC70 and MDA-MB231 (upper panel) TNBC cell lines for 24 hours are presented (\* $p < 0.05$ ). Immunoblot (lower panel) shows higher expression of E-cadherin (lanes 2, 3, 8, 14) as compared to (lanes 1, 4, 5, 6, 7, 9-13) in TNBC cell lines. Alpha-tubulin expression is used as loading control.

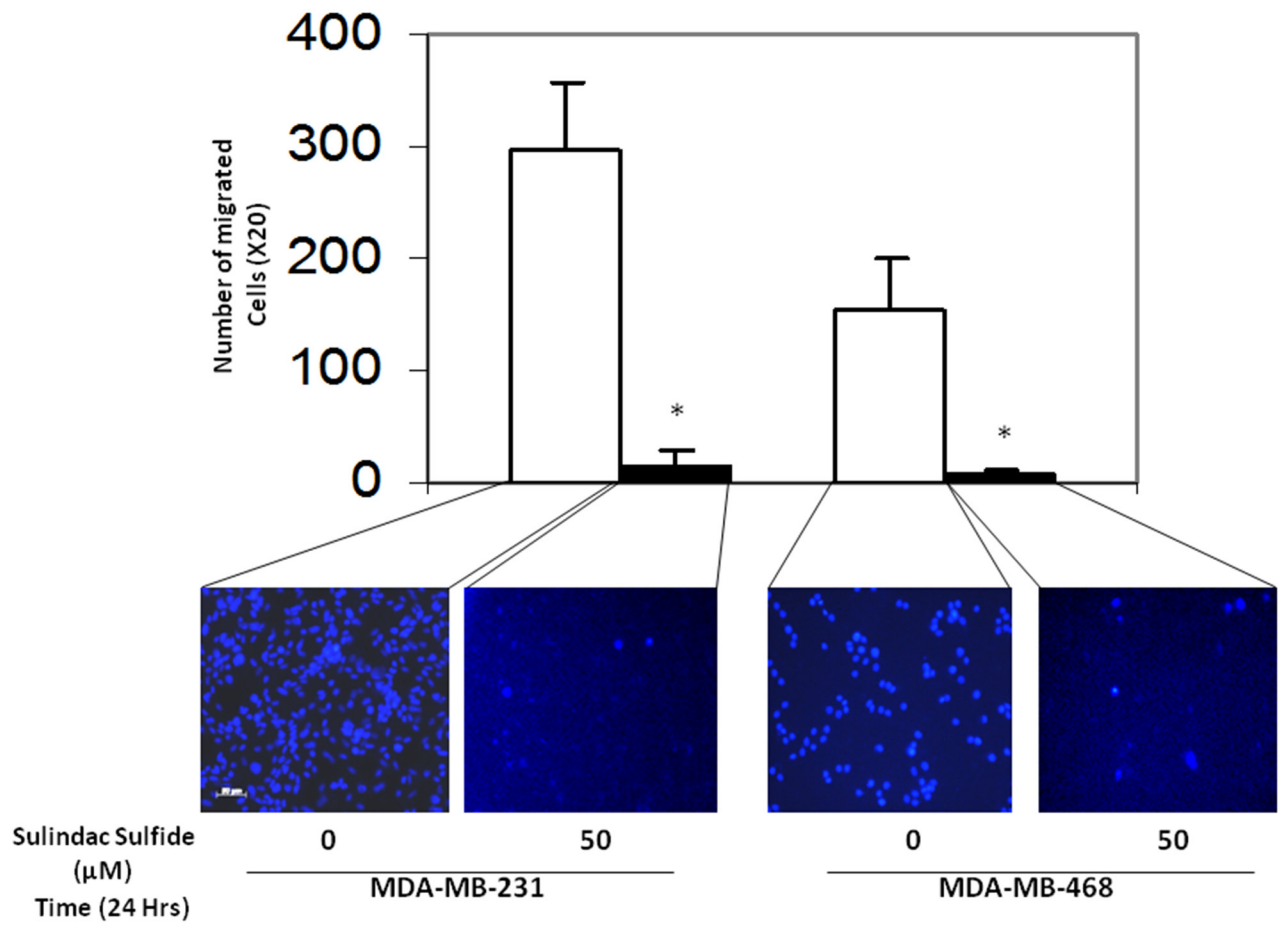

**Supplementary Figure S4: Sulindac sulfide blocked fibronectin directed migration of TNBC cell lines in transwell assay for 24 hours.** Each bar represents Mean ± SD of the number of cells migrated as counted in randomly chosen fields following DAPI staining. n=8-10, \*p< 0.05.

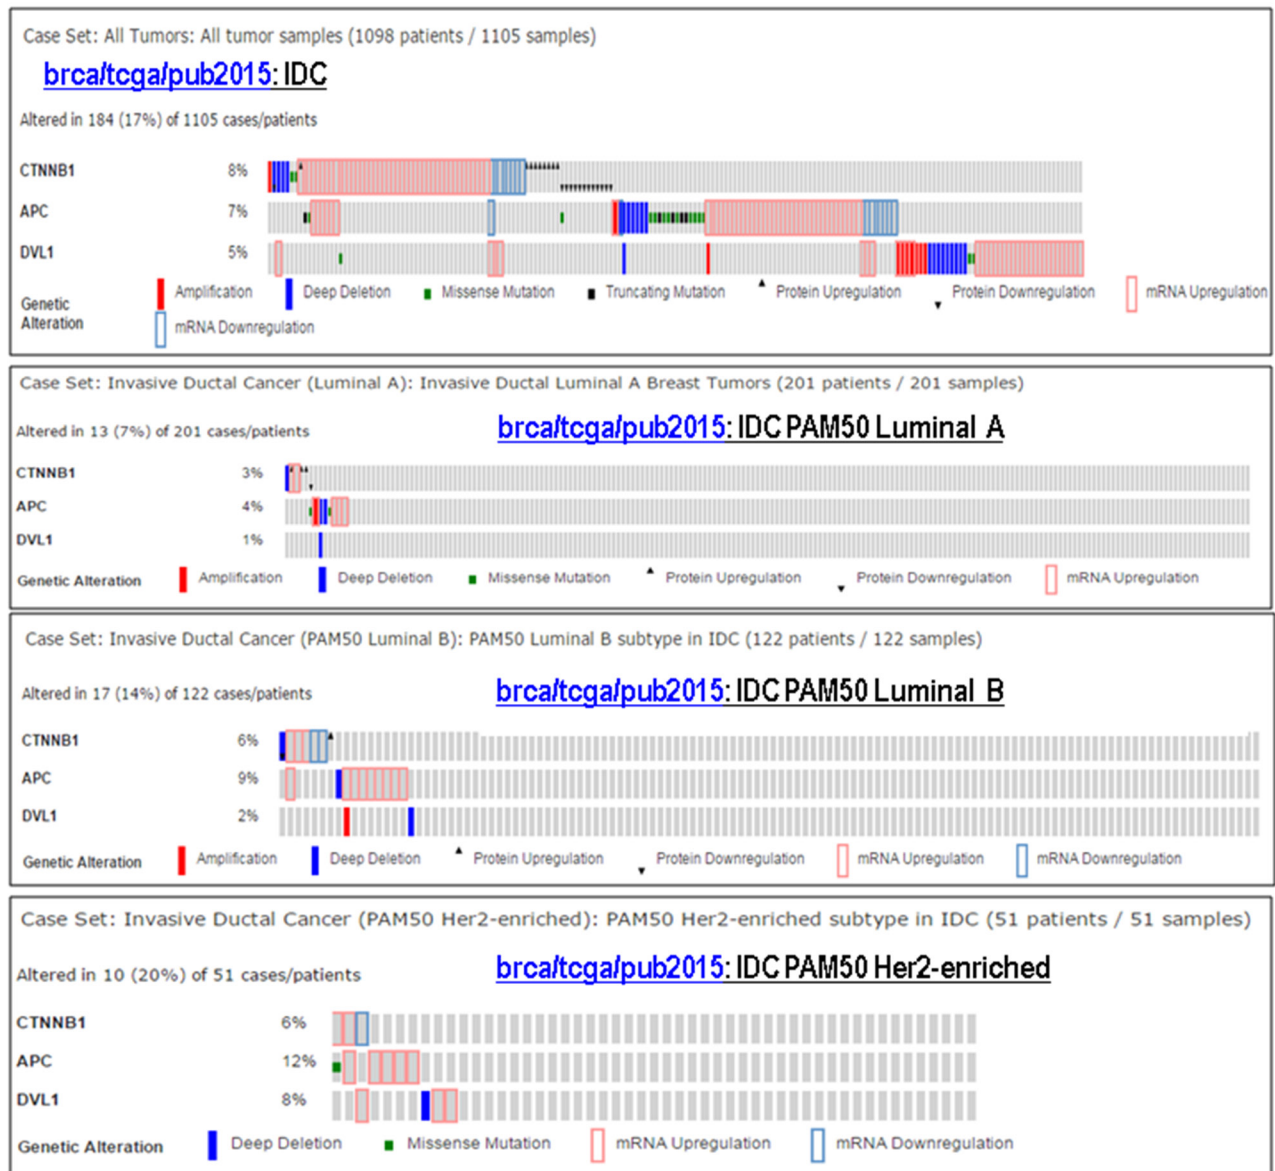

**Supplementary Figure S5: Alterations of WP genes in BC and its subtypes: Oncoprints showing alterations in WP associated three genes *CTNNB1*, *APC* and *DVL1* (amplification, deep deletion, missense mutation, mRNA upregulation, mRNA downregulation, protein upregulation and protein downregulation) in IDC, *brca/tcga/pub2015* (uppermost panel), IDC PAM50 Luminal A *brca/tcga/pub2015* (upper middle panel), IDC PAM50 Luminal B *brca/tcga/pub2015* (lower middle panel) and IDC PAM50 Her2-enriched *brca/tcga/pub2015* (lowermost panel). The oncoprints are generated using 1098 patients/1105 samples for all tumors, using 201 patients/201 samples for IDC PAM50 Luminal A, using 122 patients/122 samples for IDC PAM50 Luminal B and using 51 patients/51 samples for IDC PAM50 Her2-enriched. Oncoprints (different levels of zoom) have been generated using cBioPortal. Protein level obtained from IHC staining (cBioPortal).**

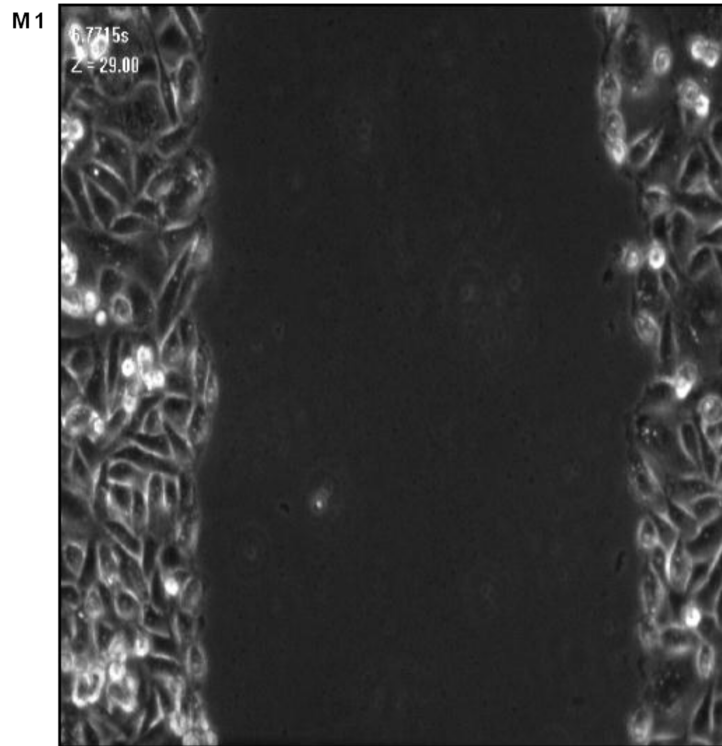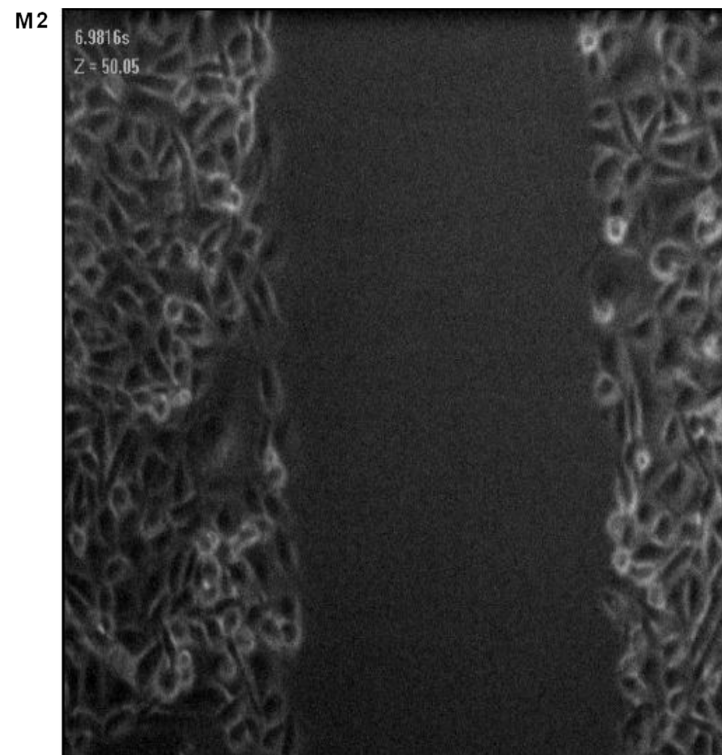

**Supplementary Movie M1 & M2: Real-time migration of MDA-MB231TNBC cell on fibronectin (M1) and its inhibition by sulindac sulfide (M2): Sulindac sulfide (50  $\mu$ M) blocked fibronectin-directed real-time migration of live MDA-MB231 cell line in the wound healing scratch assay.**
